# Supplementary material for: Implementation of a Process for Initial Transcranial Doppler Ultrasonography in Children With Sickle Cell Anemia
Source: PubMed Central journal article supplement — Am J Prev Med. Author manuscript; Available in PMC 2016 Jul 1. (PMC4924807; doi:10.1016/j.amepre.2016.01.021), 2016-07

**Appendix  
Implementation of a Process for Initial Transcranial Doppler  
Ultrasonography in Children With Sickle Cell Anemia  
Crosby et al.**

**Appendix Figure 1.**

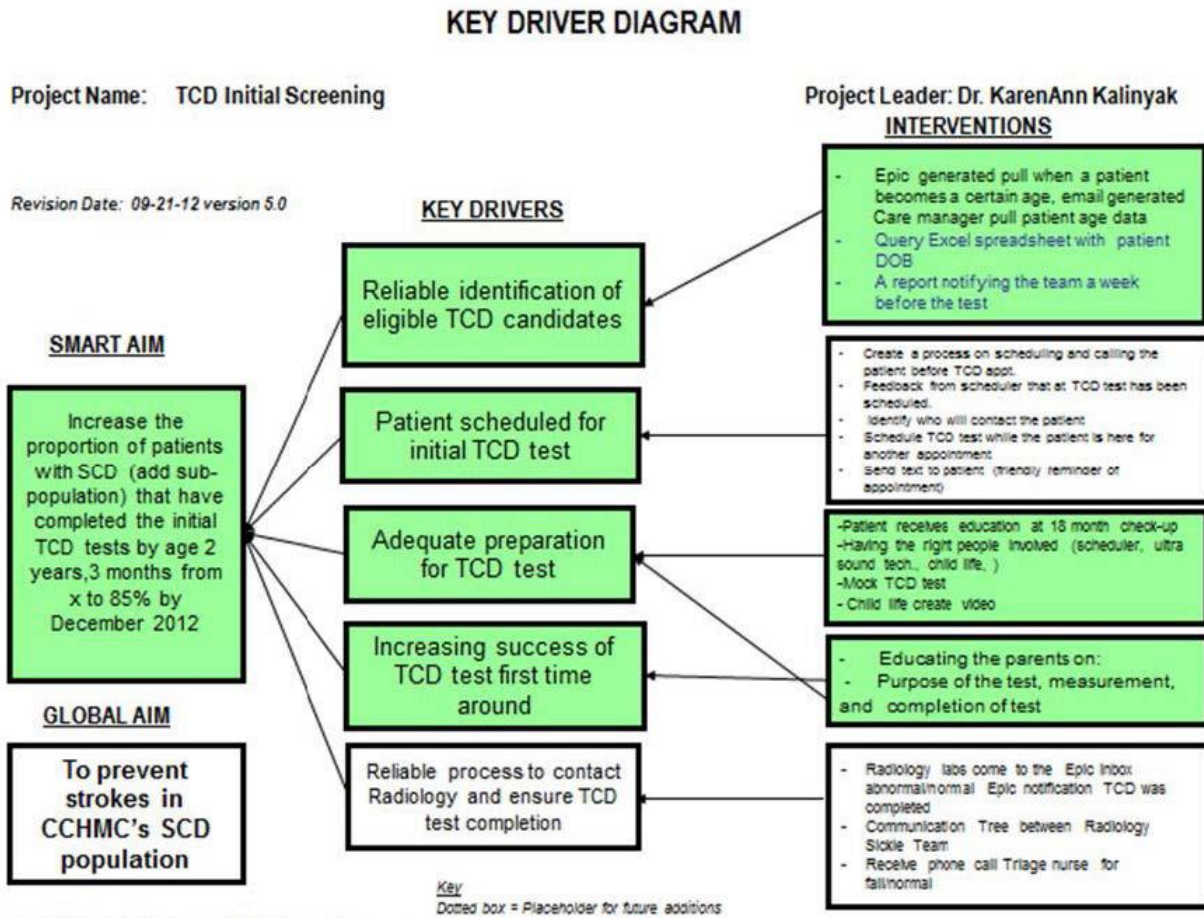

Supplement: NIHMS796668-supplement-Appendix_Figure_1.pdf [file NIHMS796668-supplement-Appendix_Figure_1.pdf]
